# Supplementary material for: Older Adults with Physical Frailty and Sarcopenia Show Increased Levels of Circulating Small Extracellular Vesicles with a Specific Mitochondrial Signature
Source: PubMed Central journal article supplement (PMC7227017; doi:10.3390/cells9040973), 2020-04-15
Supplement: cells-09-00973-s001.pdf [file cells-09-00973-s001.pdf]

**Table S1.** Technical specifications of the primary antibodies used for Western immunoblotting.

| Antibody             | Manufacturer and Catalog Number                                    | Type       | Species | Dilution | Detected Band MW (kDa) |
|----------------------|--------------------------------------------------------------------|------------|---------|----------|------------------------|
| ATP5A (complex V)    |                                                                    |            |         |          | 55                     |
| MTCOI (complex IV)   | Abcam                                                              |            |         |          | 40                     |
| NDUFB8 (complex I)   | (Cambridge, MA, USA)                                               | Monoclonal | Mouse   | 1:250    | 20                     |
| SDHB (complex II)    | ab1104413                                                          |            |         |          | 30                     |
| UQCRC2 (complex III) |                                                                    |            |         |          | 48                     |
| CD9                  | Santa Cruz<br>Biotechnology<br>(Santa Cruz, CA, USA)<br>(sc-13118) | Monoclonal | Mouse   | 1:200    | 25                     |
| CD63                 | Santa Cruz<br>Biotechnology<br>(sc-5275)                           | Monoclonal | Mouse   | 1:200    | 26                     |
| CD81                 | Santa Cruz<br>Biotechnology<br>(sc-166020)                         | Monoclonal | Mouse   | 1:200    | 25                     |
| NDUFS3 (complex I)   | Santa Cruz<br>Biotechnology<br>(sc-374283)                         | Monoclonal | Mouse   | 1:200    | 25                     |
| Flotilin             | Santa Cruz<br>Biotechnology<br>(sc-74566)                          | Monoclonal | Mouse   | 1:200    | 48                     |
| HNRNPA1              | Santa Cruz<br>Biotechnology<br>(sc-32301)                          | Monoclonal | Mouse   | 1:1000   | 36                     |

*Abbreviations:* ATP5A, adenosine triphosphate 5A; MTCOI, mitochondrial cytochrome C oxidase subunit I; HNRNPA1, heterogeneous nuclear ribonucleoprotein A1; MW, molecular weight; NDUFB8, nicotinamide adenine dinucleotide reduced form (NADH):ubiquinone oxidoreductase subunit B8; NDUFS3, NADH:ubiquinone oxidoreductase subunit S3; SDHB, succinate dehydrogenase complex iron sulfur subunit B; UQCRC2, ubiquinol-cytochrome C reductase core protein 2.
